# Supplementary material for: Tumor and nodal staging of colon cancer: accuracy of preoperative computed tomography at a Swedish high-volume center
Source: PubMed Central journal article supplement — Acta Radiol Open. 2019 Dec 30;8(12):2058460119888713. doi: 10.1177/2058460119888713 (PMC6939391; doi:10.1177/2058460119888713), 2019-12-30
Supplement: ARR888713_Supplemental_Material.pdf [file ARR888713_Supplemental_Material.pdf]

Supplements

s Table 1. cT versus pT stage (including non-validated data)

| Preoperative T-stage | Postoperative T-stage      |     |     | Total |
|----------------------|----------------------------|-----|-----|-------|
|                      | T1-2                       | T3  | T4  |       |
| T1-2                 | 56                         | 114 | 44  | 214   |
| T3                   | 19                         | 136 | 62  | 217   |
| T4                   | 1                          | 15  | 57  | 73    |
| Total                | 76                         | 265 | 163 | 504   |
| Weighted accuracy    | 81% (95% CI 77%-84%)       |     |     |       |
| Weighted kappa       | 0.321 (95% CI 0.252-0.391) |     |     |       |

s Table 2. cN versus cT stage (including non-validated data)

| Preoperative N-stage | Postoperative N-stage      |      | Total |
|----------------------|----------------------------|------|-------|
|                      | N0                         | N1-2 |       |
| N0                   | 232                        | 135  | 367   |
| N1-2                 | 63                         | 121  | 184   |
| Total                | 295                        | 256  | 551   |
| Accuracy             | 64% (95% CI 60%-68%)       |      |       |
| Kappa                | 0.264 (95% CI 0.183-0.345) |      |       |
| Sensitivity          | 66% (95% CI 60%-71%)       |      |       |
| Specificity          | 32% (95% CI 25%-39%)       |      |       |
